# Supplementary material for: Prioritizing chronic obstructive pulmonary disease (COPD) candidate genes in COPD-related networks
Source: PubMed Central journal article supplement (PMC5732734; doi:10.18632/oncotarget.21874), 2017-10-17
Supplement: oncotarget-08-103375-s001.pdf [file oncotarget-08-103375-s001.pdf]

## Prioritizing chronic obstructive pulmonary disease (COPD) candidate genes in COPD-related networks

### SUPPLEMENTARY MATERIALS

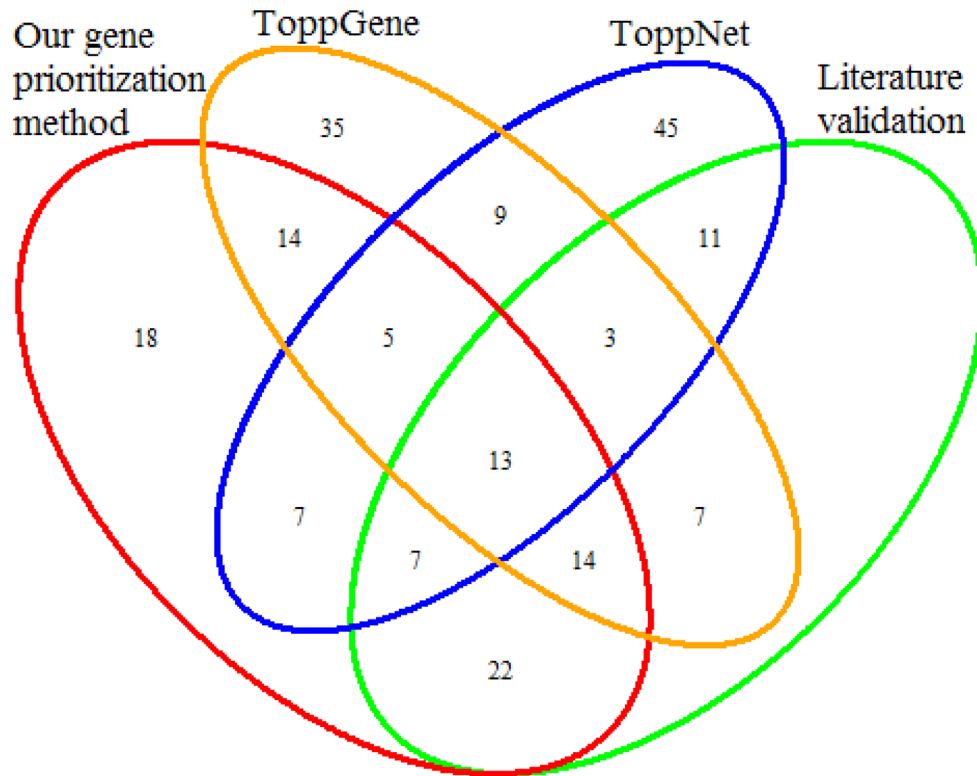

Supplementary Figure 1: Overlap of top 100 genes from our gene prioritization method, ToppGene and ToppNet, and their literature validation for the COPD-related metabolic network.

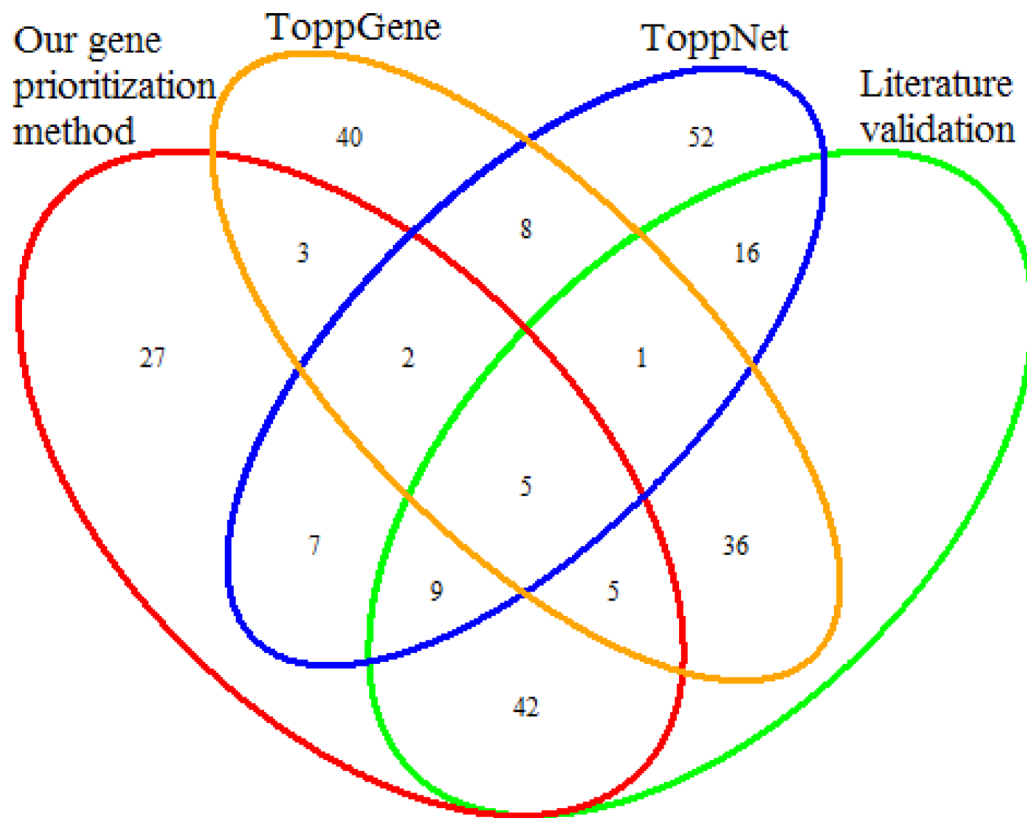

Supplementary Figure 2: Overlap of top 100 genes from our gene prioritization method, ToppGene and ToppNet, and their literature validation the COPD-related PPI network.

**Supplementary Table 1: The number of significantly enriched functions and pathways, and the number and proportion of COPD-related functions and pathways in these significantly enriched functions and pathways, for top 100 genes from our gene prioritization method, ToppGene and ToppNet in COPD-related metabolic and PPI networks**

|                                |                                | Function               |                            | Pathway                |                            |
|--------------------------------|--------------------------------|------------------------|----------------------------|------------------------|----------------------------|
|                                |                                | Significantly enriched | COPD- related (proportion) | Significantly enriched | COPD- related (proportion) |
| COPD-related metabolic network | Our gene prioritization method | 143                    | 86 (60.140%)               | 34                     | 32 (94.118%)               |
|                                | ToppGene                       | 100                    | 55 (55%)                   | 20                     | 15 (75%)                   |
|                                | ToppNet                        | 75                     | 42 (56%)                   | 19                     | 9 (47.368%)                |
| COPD-related PPI network       | Our gene prioritization method | 541                    | 223 (41.220%)              | 104                    | 78 (75%)                   |
|                                | ToppGene                       | 307                    | 175 (57.003%)              | 53                     | 42 (79.245%)               |
|                                | ToppNet                        | 134                    | 76 (56.716%)               | 40                     | 32 (80%)                   |
